# Supplementary material
Source: publisher site journal article supplement (https://www.dovepress.com/article/supplementary_file/586296/586296%20Revised%20%20supplementary%20material.docx)
Supplement: Supplementary file 1 [file 586296%20Revised%20%20supplementary%20material.docx]

S1 File.

This is the SPIRIT 2025 checklist containing the items recommended to address in a clinical trial protocol and related documents, marking where each item is located in the text.

**SPIRIT 2025 checklist of items to address in a randomized trial protocol***

| **Section / Topic** | **No** | **SPIRIT 2025 checklist item description** | **Reported on page no.** |
| --- | --- | --- | --- |
| **Administrative information** | | |  |
| Title and structured summary | 1a | Title stating the trial design, population, and interventions, with identification as a protocol | 1 |
| 1b | Structured summary of trial design and methods, including items from the World Health Organization Trial Registration Data Set | 3 |
| Protocol version | 2 | Version date and identifier | 17 |
| Roles and responsibilities | 3a | Names, affiliations, and roles of protocol contributors | 1 |
| 3b | Name and contact information for the trial sponsor | 17 |
| 3c | Role of trial sponsor and funders in design, conduct, analysis, and reporting of trial; including any authority over these activities | 17 |
| 3d | Composition, roles, and responsibilities of the coordinating site, steering committee, endpoint adjudication committee, data management team, and other individuals or groups overseeing the trial, if applicable | 14 |
| **Open science** | | |  |
| Trial registration | 4 | Name of trial registry, identifying number (with URL), and date of registration. If not yet registered, name of intended registry | 9 |
| Protocol and statistical analysis plan | 5 | Where the trial protocol and statistical analysis plan can be accessed | 7 |
| Data sharing | 6 | Where and how the individual de-identified participant data (including data dictionary), statistical code, and any other materials will be accessible | 17 |
| Funding and conflicts of interest | 7a | Sources of funding and other support (e.g., supply of drugs) | 17 |
| 7b | Financial and other conflicts of interest for principal investigators and steering committee members | 17 |
| Dissemination policy | 8 | Plans to communicate trial results to participants, healthcare professionals, the public, and other relevant groups (e.g., reporting in trial registry, plain language summary, publication) | 17 |
| **Introduction** | | |  |
| Background and rationale | 9a | Scientific background and rationale, including summary of relevant studies (published and unpublished) examining benefits and harms for each intervention | 4 |
| 9b | Explanation for choice of comparator | 11 |
| Objectives | 10 | Specific objectives related to benefits and harms | 10 |
| **Methods: Patient and public involvement, trial design** | | |  |
| Patient and public involvement | 11 | Details of, or plans for, patient or public involvement in the design, conduct, and reporting of the trial | 10 |
| Trial design | 12 | Description of trial design including type of trial (e.g., parallel group, crossover), allocation ratio, and framework (e.g., superiority, equivalence, non-inferiority, exploratory) | 12 |
| **Methods: Participants, interventions, and outcomes** | | |  |
| Trial setting | 13 | Settings (e.g., community, hospital) and locations (e.g., countries, sites) where the trial will be conducted | 10 |
| Eligibility criteria | 14a | Eligibility criteria for participants | 11 |
| 14b | If applicable, eligibility criteria for sites and for individuals who will deliver the interventions (e.g., surgeons, physiotherapists) | 10 |
| Intervention and comparator | 15a | Intervention and comparator with sufficient details to allow replication including how, when, and by whom they will be administered. If relevant, where additional materials describing the intervention and comparator (e.g., intervention manual) can be accessed | 11-12 |
| 15b | Criteria for discontinuing or modifying allocated intervention/comparator for a trial participant (e.g., drug dose change in response to harms, participant request, or improving/worsening disease) | 15 |
| 15c | Strategies to improve adherence to intervention/comparator protocols, if applicable, and any procedures for monitoring adherence (e.g., drug tablet return, sessions attended) | 13 |
| 15d | Concomitant care that is permitted or prohibited during the trial | 12 |
| Outcomes | 16 | Primary and secondary outcomes, including the specific measurement variable (e.g., systolic blood pressure), analysis metric (e.g., change from baseline, final value, time to event), method of aggregation (e.g., median, proportion), and time point for each outcome | 13 |
| Harms | 17 | How harms are defined and will be assessed (e.g., systematically, non-systematically) | 15 |
| Participant timeline | 18 | Time schedule of enrollment, interventions (including any run-ins and washouts), assessments, and visits for participants. A schematic diagram is highly recommended (see Figure) | 9 |
| Sample size | 19 | How sample size was determined, including all assumptions supporting the sample size calculation | 14 |
| Recruitment | 20 | Strategies for achieving adequate participant enrollment to reach target sample size | 10 |
| **Methods: Assignment of interventions** | | |  |
| Randomization: |  |  | 12 |
| Sequence generation | 21a | Who will generate the random allocation sequence and the method used | 12 |
| 21b | Type of randomization (simple or restricted) and details of any factors for stratification. To reduce predictability of a random sequence, other details of any planned restriction (e.g., blocking) should be provided in a separate document that is unavailable to those who enroll participants or assign interventions | 12 |
| Allocation concealment  mechanism | 22 | Mechanism used to implement the random allocation sequence (e.g., central computer/telephone; sequentially numbered, opaque, sealed containers), describing any steps to conceal the sequence until interventions are assigned | 12 |
| Implementation | 23 | Whether the personnel who will enroll and those who will assign participants to the interventions will have access to the random allocation sequence | 12 |
| Blinding | 24a | Who will be blinded after assignment to interventions (e.g., participants, care providers, outcome assessors, data analysts) | 12 |
| 24b | If blinded, how blinding will be achieved and description of the similarity of interventions | 12 |
| 24c | If blinded, circumstances under which unblinding is permissible, and procedure for revealing a participant’s allocated intervention during the trial | 12 |
| **Methods: Data collection, management, and analysis** | | |  |
| Data collection methods | 25a | Plans for assessment and collection of trial data, including any related processes to promote data quality (e.g., duplicate measurements, training of assessors) and a description of trial instruments (e.g., questionnaires, laboratory tests) along with their reliability and validity, if known. Reference to where data collection forms can be accessed, if not in the protocol | 14 |
| 25b | Plans to promote participant retention and complete follow-up, including list of any outcome data to be collected for participants who discontinue or deviate from intervention protocols | 14 |
| Data management | 26 | Plans for data entry, coding, security, and storage, including any related processes to promote data quality (e.g., double data entry; range checks for data values). Reference to where details of data management procedures can be accessed, if not in the protocol | 14 |
| Statistical methods | 27a | Statistical methods used to compare groups for primary and secondary outcomes, including harms | 14 |
| 27b | Definition of who will be included in each analysis (e.g., all randomized participants), and in which group | 14 |
| 27c | How missing data will be handled in the analysis | 15 |
| 27d | Methods for any additional analyses (e.g., subgroup and sensitivity analyses) | N/A |
| **Methods: Monitoring** | | |  |
| Data monitoring committee | 28a | Composition of data monitoring committee (DMC); summary of its role and reporting structure; statement of whether it is independent from the sponsor and funder; conflicts of interest and reference to where further details about its charter can be found, if not in the protocol. Alternatively, an explanation of why a DMC is not needed | 14 |
| 28b | Explanation of any interim analyses and stopping guidelines, including who will have access to these interim results and make the final decision to terminate the trial | N/A |
| Trial monitoring | 29 | Frequency and procedures for monitoring trial conduct. If there is no monitoring, give explanation | 14 |
| **Ethics** | | |  |
| Research ethics approval | 30 | Plans for seeking research ethics committee/institutional review board approval | 17 |
| Protocol amendments | 31 | Plans for communicating important protocol modifications to relevant parties | 15 |
| Consent or assent | 32a | Who will obtain informed consent or assent from potential trial participants or authorized proxies, and how | 10 |
| 32b | Additional consent provisions for collection and use of participant data and biological specimens in ancillary studies, if applicable | N/A |
| Confidentiality | 33 | How personal information about potential and enrolled participants will be collected, shared, and maintained in order to protect confidentiality before, during, and after the trial | 14 |
| Ancillary and post-trial care | 34 | Provisions, if any, for ancillary and post-trial care, and for compensation to those who suffer harm from trial participation | N/A |

*We strongly recommend reading this checklist in conjunction with the SPIRIT 2025 Explanation and Elaboration and the SPIRIT 2025 Expanded Checklist for important clarifications on all the items. We also recommend reading relevant SPIRIT extensions. See [www.consort-spirit.org](http://www.consort-spirit.org)

Citation: Chan A-W, Boutron I, Hopewell S, Moher D, Schulz KF, et al. SPIRIT 2025 statement: updated guideline for protocols of randomised trials. BMJ 2025;389:e081477. <https://dx.doi.org/10.1136/bmj-2024-081477>

© 2025 Chan A-W et al. This is an Open Access article distributed under the terms of the Creative Commons Attribution License (<https://creativecommons.org/licenses/by/4.0/>), which permits unrestricted use, distribution, and reproduction in any medium, provided the original work is properly cited.

# S2 File.

# This is the material submitted when applying for ethics, which contains a brief description of the study protocol and informed consent form.

# Study Protocol

Project Name: Clinical Study on Sedative and Analgesic Effects of Virtual Reality Technology in Children with Acute Pulpitis

Project Source: Independent Scientific Research Project of Logistics

ResearchDuration: February 2026 – November 2026

Research Site: The 960th Hospital of the Joint Logistic Support Force of the Chinese People's Liberation Army

Principal Investigators: Tang Lu, Wang Fei, Zhou Lingjun, Li Yuxiang, Cao Wenjuan, Sun Chenxi, Qiu Xueling, Wang Weifeng, Sun Fan

Contact Information: 15064003655

## I. Overview

Pulpotomy and drainage is a key emergency treatment for pulp and periapical emergencies such as acute pulpitis and acute periapical periodontitis in clinical practice. It is a core therapeutic method to quickly relieve pain caused by intracanal hypertension and control the spread of infection. It not only creates conditions for subsequent root canal treatment but also maximizes the preservation of tooth function. As a basic operation in oral emergency treatment, it discharges inflammatory exudates by establishing an intracanal drainage channel, which is of great significance for alleviating patient suffering and preventing infection from spreading to the maxillofacial region. It is also an essential part of the treatment process in endodontics. However, during pulpotomy and drainage, patients often experience significant pain and discomfort due to insufficient local anesthesia, mechanical stimulation during the operation, sensitive reactions after pulp exposure, and fear of dental treatment. Dental anxiety (DA) may cause patients to refuse treatment and miss the optimal treatment time, seriously affecting their oral health and quality of life. This project aims to explore the safety and effectiveness of virtual reality technology in pulpotomy and drainage for children with acute pulpitis, providing empirical evidence for reducing or eliminating pain and alleviating anxiety during the treatment.

## II. Research Objects

1. Sample Size Calculation: Based on sample size calculation and expert consultation, the total sample size is determined to be 100 cases, with 50 cases in the intervention group and 50 cases in the control group.
2. Inclusion Criteria: Aged 6–12 years; VAS-A score ≥ 4 points; clinically diagnosed with acute pulpitis by pediatric dentists requiring pulpotomy and drainage; no cognitive impairment with independent expression ability; willing to participate in the study and sign the informed consent form.
3. Exclusion Criteria: Children or their families who refuse to participate; children with visual or auditory impairments; children with a history of epilepsy or seizures; patients with motion sickness caused by virtual reality images; those with communication disorders unable to cooperate with VR equipment; children who have taken analgesic drugs recently; patients who withdraw midway during treatment.
4. Dropout Criteria: ① Patients with severe adverse reactions or complications that make continued participation inappropriate; ② Patients who voluntarily withdraw during the study; ③ Patients with incomplete data affecting result judgment.

## III. Research Content and Methods

### Study Design

A combination of qualitative research and retrospective case study is adopted to understand the current status of pain control in the treatment of children with acute pulpitis at home and abroad. A randomized open-label controlled study design is used to explore the sedative and analgesic effects of virtual reality technology in children with acute pulpitis.

### Research Methods

1. Qualitative Research: Purposive sampling is used for front-line clinical medical staff with more than three years of work experience in a Grade A tertiary hospital and children with acute pulpitis attending the hospital. Data are collected through face-to-face, semi-structured, in-depth interviews.
2. Quantitative Research: A randomized open-label controlled trial is conducted to observe the intervention effect of virtual reality technology on pain in children with acute pulpitis undergoing pulpotomy and drainage.

## IV. Expected Research Outcomes

1. Compile nursing operating procedures for this appropriate technology.
2. Train project staff.
3. Publish 1 Chinese paper and 1 SCI paper.

# Informed Consent Form

Dear Madam/Sir,

We invite you to participate in the "Clinical Study on Sedative and Analgesic Effects of Virtual Reality Technology in Children with Acute Pulpitis". If you agree to join this study, please carefully read the following content and make a decision after full consideration. This informed consent form has been reviewed and approved by the Medical Ethics Committee of The 960th Hospital of the Joint Logistic Support Force of the Chinese People's Liberation Army. Please feel free to raise any questions to the researchers in charge of the study at any time.

## I. Brief Introduction to the Research Project

VR glasses are devices developed based on head-mounted virtual reality technology. They output videos under the eye-surrounding mask and play 3D images downloaded via computer software to divert attention, block light, and isolate external stimuli such as treatment scenes and noises. Studies have shown that VR glasses can effectively transfer children from an unpleasant treatment environment to an attractive and pleasant virtual game environment. When children interact with the virtual world created by VR glasses, their perception of pain is reduced, thereby effectively attracting their attention and greatly alleviating discomfort and anxiety during treatment. VR glasses are safe and comfortable to wear, easily accepted by children, and have high patient compliance and satisfaction. Initially developed for military training and as an entertainment tool, VR technology has found various applications in healthcare over the past 20 years, including the treatment of phobias and anxiety disorders, cognitive and physical rehabilitation, acute and chronic pain management, supporting cancer patients in different settings (such as pain during hospitalization and chemotherapy), treating eating disorders and obesity, and surgical training and planning. To date, VR has also been used in the treatment of post-burn pain, toothache, ischemic pain, cancer pain, chronic headaches, etc., which can not only reduce patients' pain perception but also improve their mental health.

This project aims to explore the safety and effectiveness of virtual reality technology in pulpotomy and drainage for children with acute pulpitis, establish and improve a safe, effective, simple, non-invasive, and drug-free sedative and analgesic method, and provide a reference for sedation and analgesia in patients with pain during pulpotomy.

## II. Inclusion and Exclusion Criteria for Subjects

### Inclusion Criteria:

- Aged 6–12 years old;
- VAS-A score ≥ 4 points;
- Clinically diagnosed with acute pulpitis by pediatric dentists requiring pulpotomy and drainage;
- No cognitive impairment and with independent expression ability.

### Exclusion Criteria:

- Children or their families who refuse to participate;
- Children with visual or auditory impairments;
- Children with a history of epilepsy or seizures;
- Patients with motion sickness caused by virtual reality images;
- Those with communication disorders unable to cooperate with VR equipment;
- Children who have taken analgesic drugs recently;
- Patients who withdraw midway during treatment.

Informed consent will be obtained from all participants, and approval from the Institutional Review Board will be obtained.

## III. Potential Benefits of the Research

In accordance with the research protocol, researchers will perform standardized operations of virtual reality technology on you. This method helps alleviate anxiety and pain during pulpotomy and drainage and improves treatment outcomes.

## IV. Risks and Compensation Measures for Participating in the Project

This research will not cause any harm to your physical, psychological, or social relationships, nor will it bring any inconvenience or negative impact on the diagnosis, laboratory tests, examinations, medication, or other treatments of your original disease. You will not receive any remuneration for participating in this research. The entire research process is supervised by the Medical Ethics Committee of The 960th Hospital of the Joint Logistic Support Force of the Chinese People's Liberation Army. If you have any questions during the research, please feel free to consult the researchers.

You will not suffer any harm caused by this research during your participation. Even if you have signed this informed consent form, you still retain all your legal rights.

## V. Confidentiality of Research Data

Individual biological samples involve private disease information, life information, genetic information, etc. If you decide to participate in this research, your participation and personal data in the research will be kept confidential. Your medical records (research medical records/CRF, laboratory test reports, etc.) will be fully stored at The 960th Hospital of the Joint Logistic Support Force of the Chinese People's Liberation Army. Members of the research team and the research supervisory department will be allowed to access your medical records. To ensure the research is conducted in accordance with regulations, members of government regulatory authorities or ethics review committees may be allowed to access your personal data within the research institution as required. No public reports related to this research will disclose your personal identity. We will make every effort to protect the privacy of your personal medical data, disease information, life information, and genetic information within the scope permitted by law. Your personal and medical information will be kept confidential and stored in a safe and secure place. At any time, you can access your personal information (such as your name and address) and modify it if necessary. The research team will strictly follow the principles of the Declaration of Helsinki and the International Ethical Guidelines for Biomedical Research Involving Humans jointly formulated by the World Health Organization and the Council for International Organizations of Medical Sciences.

By signing this informed consent form, you agree that your personal and medical information can be used in the occasions described above. Your files will be stored in the file cabinet of the Medical Records Department of The 960th Hospital of the Joint Logistic Support Force of the Chinese People's Liberation Army, and only accessible to researchers. When the results of this research are published, your personal medical data will not be disclosed.

## VI. Your Rights

Your participation in this research project is completely voluntary. You can refuse to participate in the research or withdraw from it at any time during the research process without any reason. This decision will not affect your future diagnosis and treatment, nor will it affect your relationship with medical staff. If you have any questions or need consultation during the research, you can contact your attending physician at any time.

During your participation in this research, you can choose at any time: 1. Not to participate in this research and continue your routine treatment; 2. Participate in other research; 3. Refuse any treatment.

### Volunteer Subject's Statement:

I have carefully read the informed consent form for the "Clinical Study on Sedative and Analgesic Effects of Virtual Reality Technology in Children with Acute Pulpitis". The research physician has provided a detailed explanation of the research protocol to me. I fully understand the purpose, nature, methods of participating in this research, as well as my rights and risks. I am informed that my personal data is confidential and my right to privacy is protected.

I voluntarily participate in this research and agree to cooperate with the doctors' operations in accordance with the research methods and the content of this informed consent form to complete the research earnestly. This informed consent form consists of 4 pages, and I will receive a signed copy of the informed consent form. (Note: School-age children should agree and sign in person; preschool children can be signed by their guardians on their behalf, but the child's verbal consent is required.)

Subject/Guardian's Signature: _______________ Date: _______________ Contact Phone: _______________

I have fully explained and illustrated the purpose, operation process of this clinical trial, as well as the potential risks and benefits of the subject's participation in the trial to the subject, and have satisfactorily answered all relevant questions raised by the subject.

Researcher's Signature: _______________ Date: _______________ Contact Phone: _______________
